# Supplementary material for: Surface charge density and induced currents by self-charging sliding drops
Source: Royal Society of Chemistry journal article supplement (doi:10.1039/d4sm00205a), 2024-01-01
Supplement: d4sm00205a4.pdf [file d4sm00205a4.pdf]

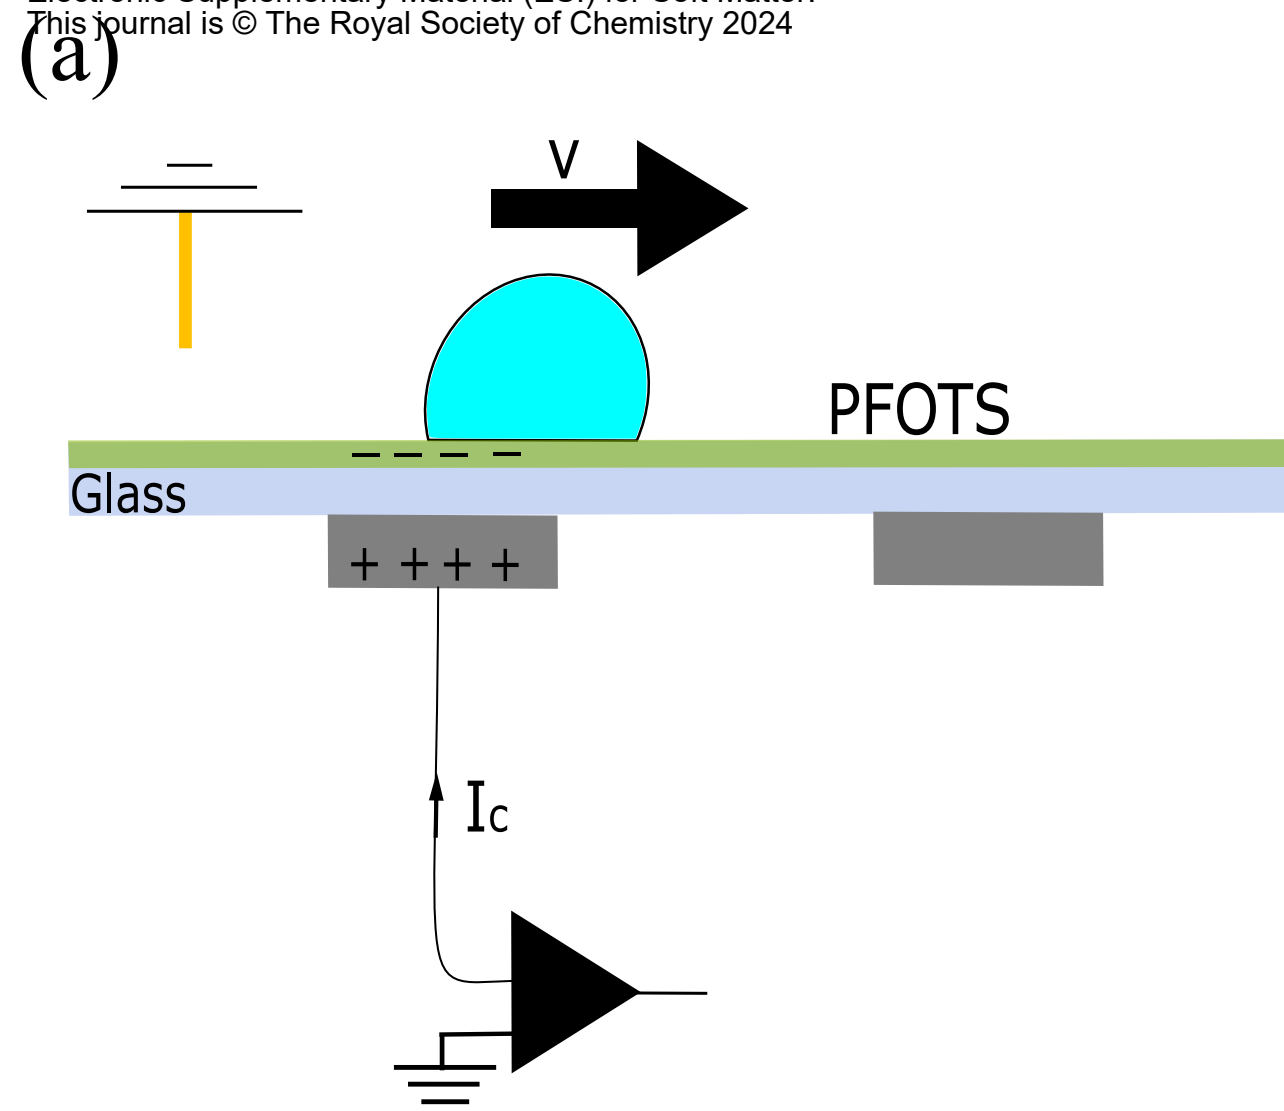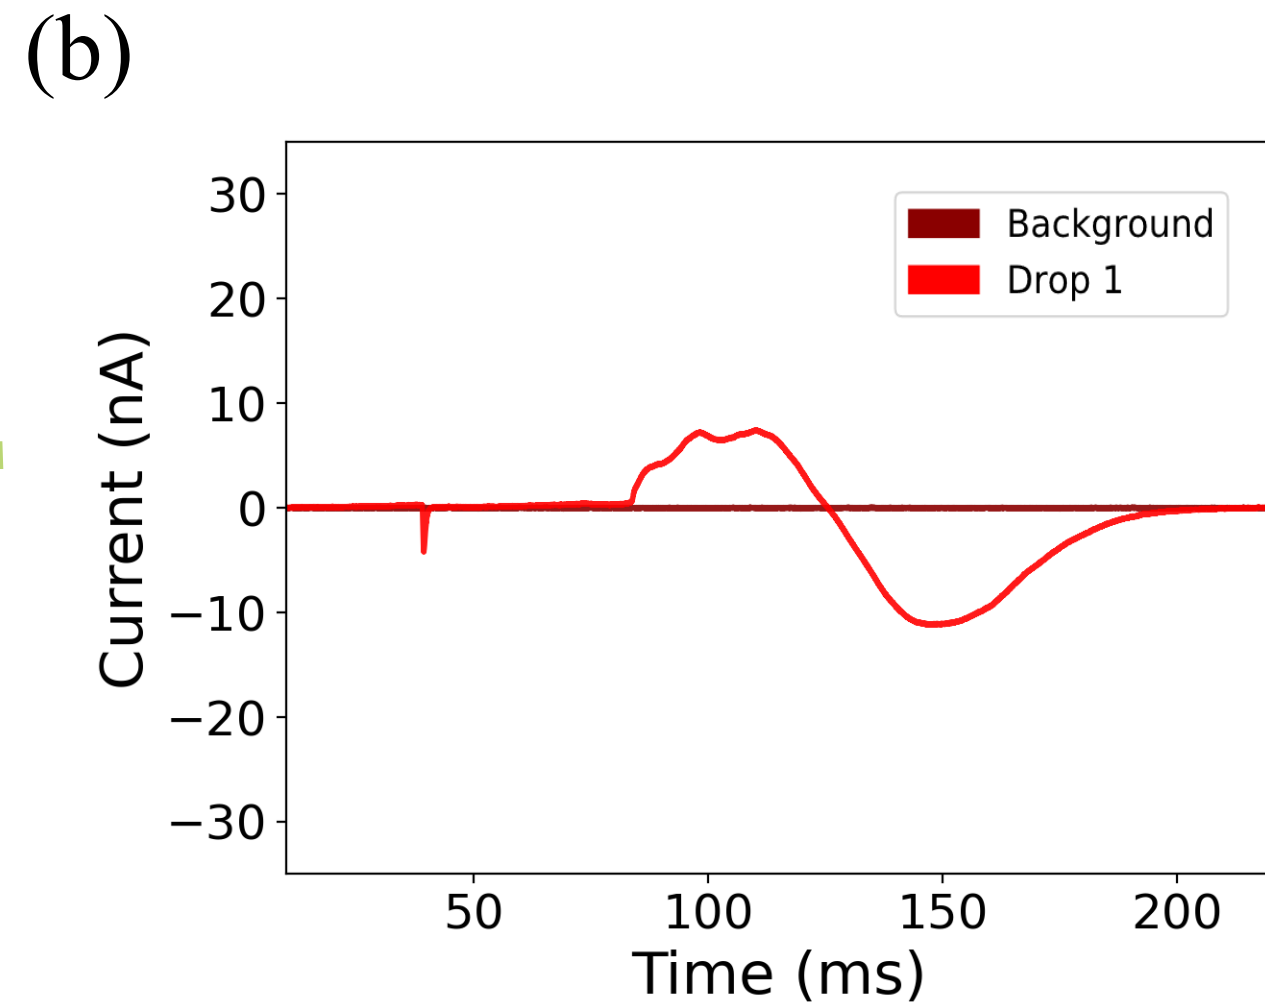

Slide length 1 cm

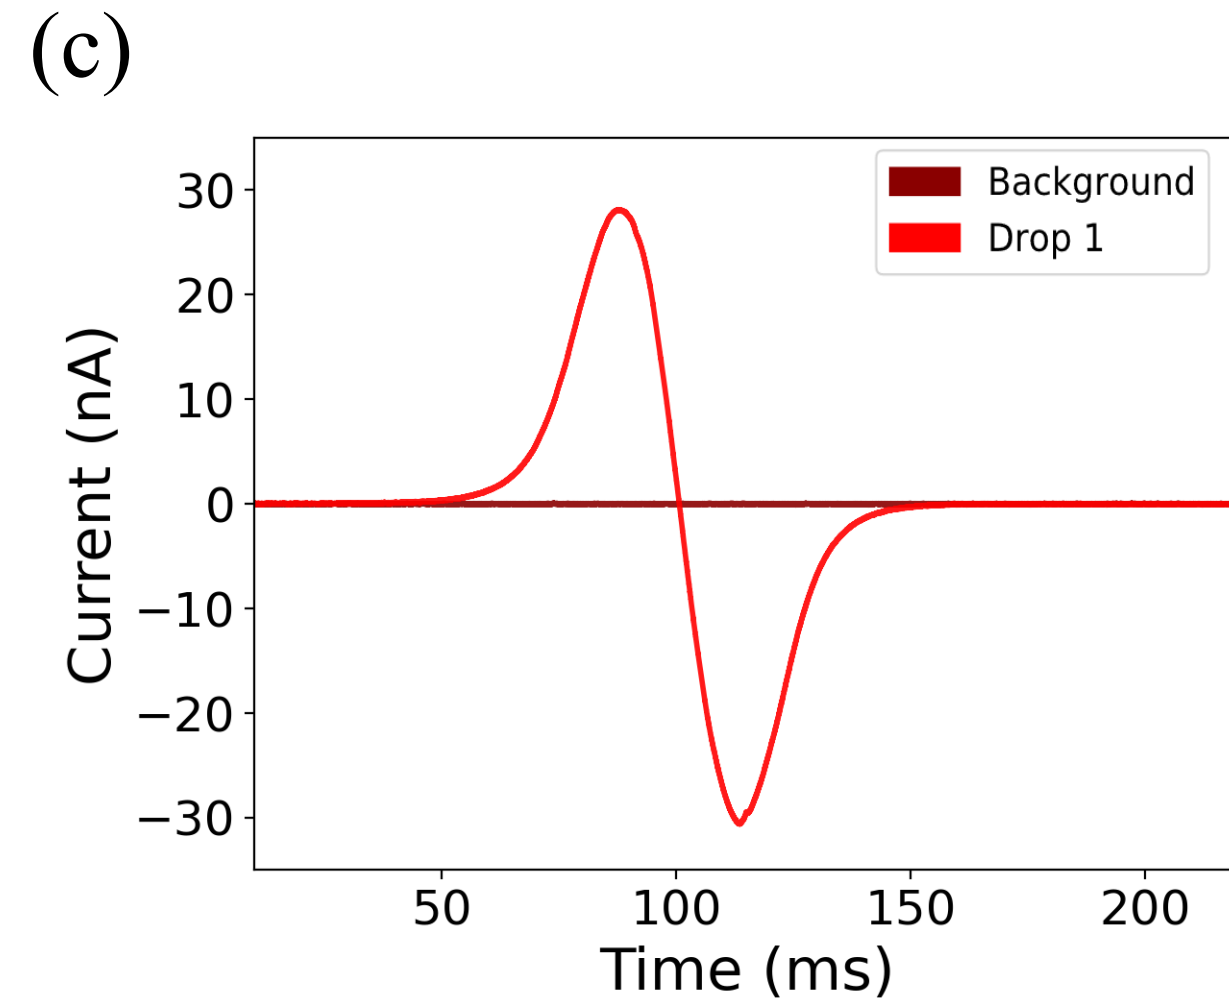

Slide length 5 cm
