# Supplementary material for: Surface charge density and induced currents by self-charging sliding drops
Source: Royal Society of Chemistry journal article supplement (doi:10.1039/d4sm00205a), 2024-01-01

(a)

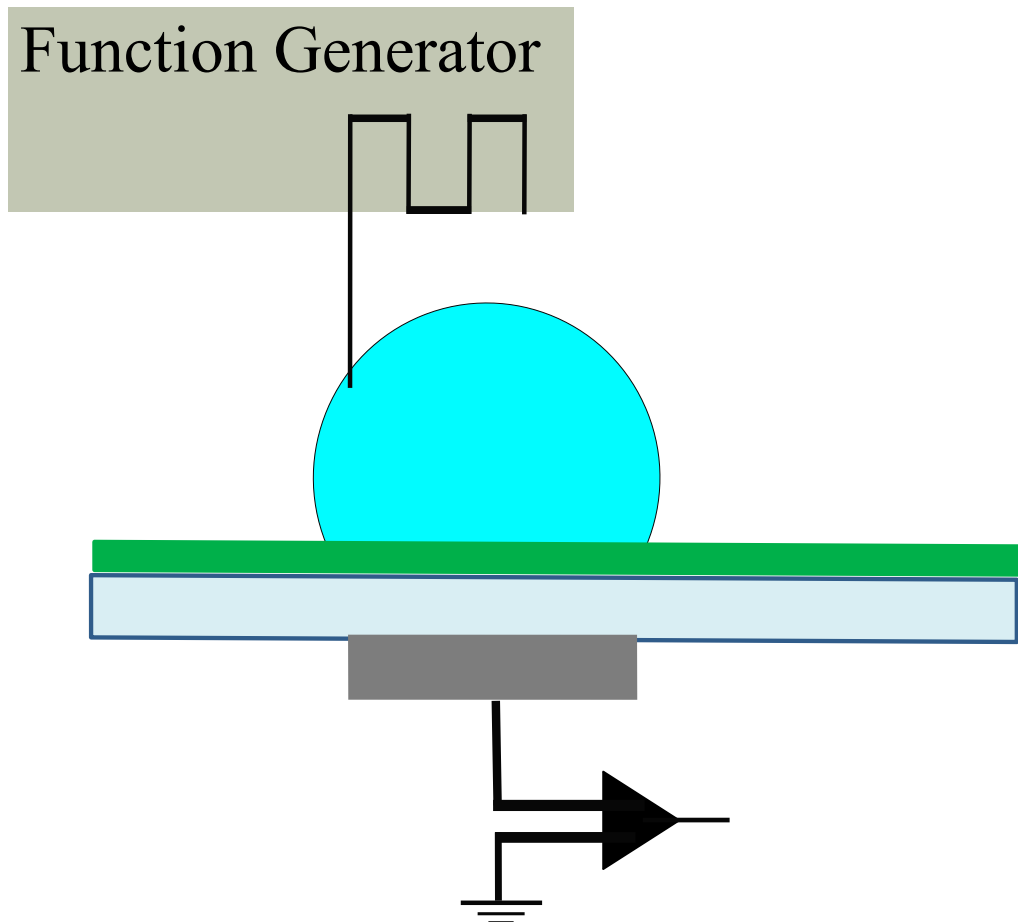

(b)

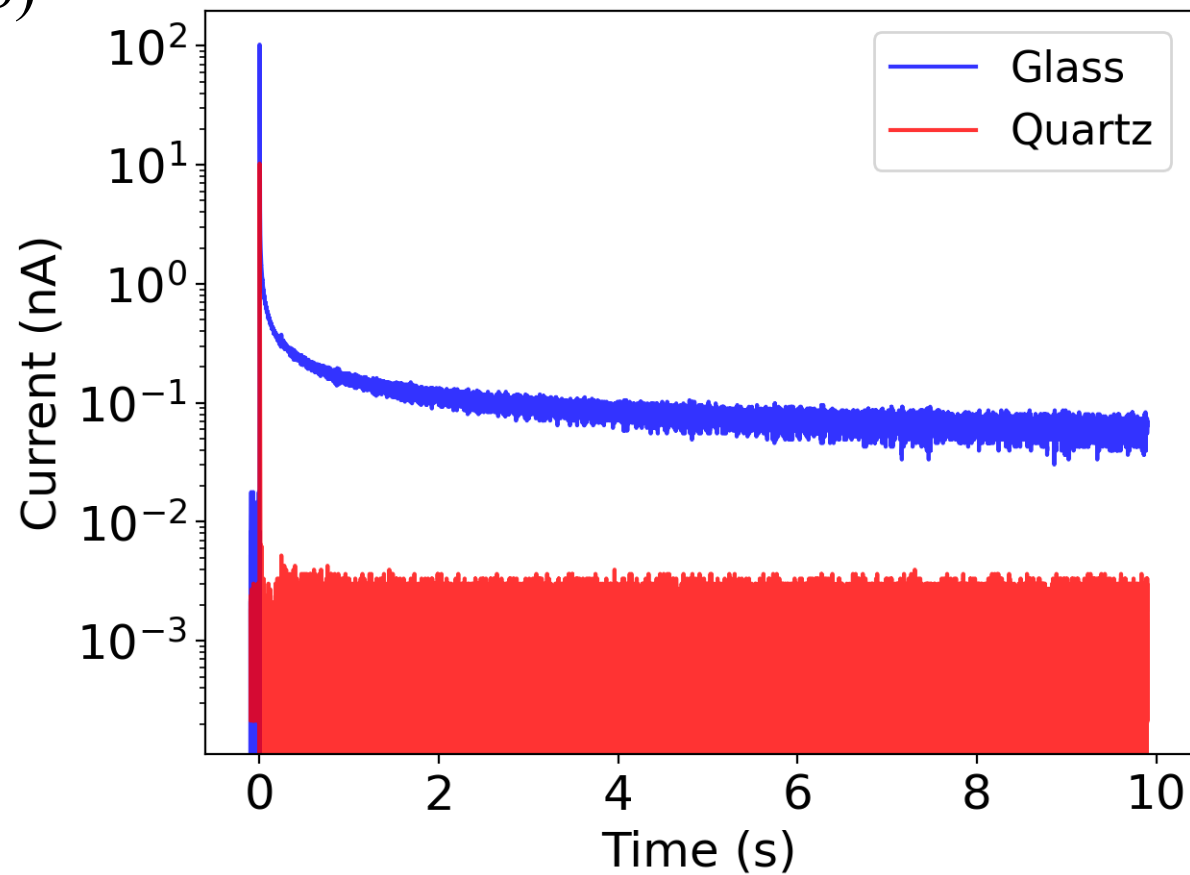

Supplement: d4sm00205a6.pdf [file d4sm00205a6.pdf]
